1 **Phylogenetic clustering of the Indian SARS-CoV-2 genomes reveals the presence of distinct**  
2 **clades of viral haplotypes among states**

3 **Bornali Bhattacharjee\* and Bhaswati Pandit\***

4 National Institute of Biomedical Genomics, Kalyani, West Bengal, India

5

6

7 **\*Correspondance:**

8 **Bornali Bhattacharjee, Bhaswati Pandit**

9 National Institute of Biomedical Genomics, Kalyani, West Bengal, India

10 E-mail: [bb2@nibmg.ac.in](mailto:bb2@nibmg.ac.in), [bp1@nibmg.ac.in](mailto:bp1@nibmg.ac.in)

11

12

13

14

15

16

17

18

19

20

## 21 **Abstract**

22 The first Indian cases of COVID-19 caused by SARS-Cov-2 were reported in February 29, 2020  
23 with a history of travel from Wuhan, China and so far above 4500 deaths have been attributed to  
24 this pandemic. The objectives of this study were to characterize Indian SARS-CoV-2 genome-  
25 wide nucleotide variations, trace ancestries using phylogenetic networks and correlate state-wise  
26 distribution of viral haplotypes with differences in mortality rates. A total of 305 whole genome  
27 sequences from 19 Indian states were downloaded from GISAID. Sequences were aligned using  
28 the ancestral Wuhan-Hu genome sequence (NC\_045512.2). A total of 633 variants resulting in  
29 388 amino acid substitutions were identified. Allele frequency spectrum, and nucleotide diversity  
30 ( $\pi$ ) values revealed the presence of higher proportions of low frequency variants and negative  
31 Tajima's D values across ORFs indicated the presence of population expansion. Network  
32 analysis highlighted the presence of two major clusters of viral haplotypes, namely, clade G with  
33 the S:D614G, RdRp: P323L variants and a variant of clade L [ $L_v$ ] having the RdRp:A97V  
34 variant. Clade G genomes were found to be evolving more rapidly into multiple sub-clusters  
35 including clade GH and GR and were also found in higher proportions in three states with  
36 highest mortality rates namely, Gujarat, Madhya Pradesh and West Bengal.

37

38

39 *Keywords:* SARS-CoV-2, phylogenetic networks, population expansion, viral genome evolution,

40 India

41

42

## 43 **1. Introduction**

44 Coronavirus disease 2019 (COVID-19) caused by the Severe Acute Respiratory Syndrome  
45 Coronavirus 2 (SARS-CoV-2) was first reported in December, 2019 from Wuhan, China and  
46 since then has spread across the globe with 349,190 deaths as reported to WHO[1, 2]. The  
47 SARS-CoV-2 has a 29.9 kilobase long RNA genome coding for 22 proteins. The first whole  
48 genome (RNA) sequence of SARS-CoV-2 was published on the 5<sup>th</sup> of January, 2020 [3] and  
49 currently more than 30,000 SARS-CoV-2 sequences have been submitted from across the world  
50 to Global Initiative on Sharing All Influenza Data (GISAID)[4]. It has also been identified on the  
51 basis of nucleotide variants that 8 major clades of viral haplotypes have spread across the globe  
52 causing the pandemic [4]. However, the implications of the evolutionary genome-wide changes  
53 still remain elusive.

54 Sequencing of SARS-CoV-2 is imperative to understand the transmission routes, possible  
55 sources and cross species evolution and transmission to human hosts. On the basis of such  
56 sequence identity it has been speculated that the bats form reservoir of such viruses (bat CoV  
57 genome, RaTG13) and are a probable species of origin [5]. Further, reports have also shown  
58 strong homology among viruses in metavirome data sets of SARS-CoV, which were generated  
59 from the lungs of deceased pangolins [6].

60 In India, the first three cases of COVID-19 with travel history from Wuhan, China were reported  
61 from the state of Kerala in February 2020. Since then the virus and the disease has spread to all  
62 37 states and union territories with 86110 active cases and 4531 deaths till date and the  
63 percentage of death rates seem to differ among states so far [7]. Attempts have been made to  
64 sequence the genomes of Indian clinical isolates to understand genome-wide variability and viral

65 evolution and over 300 sequences have been deposited to GISAID so far from many Indian  
66 states [8, 9]. However, there has been no study to delineate ancestries or to characterize the  
67 distribution patterns of viral haplotypes across states. Hence, in this study a total of 305 Indian  
68 SARS-CoV genome sequences were used in an effort to understand the evolution of these  
69 viruses, trace the routes of infection and gauge the clustering patterns across states.

## 70 **2. Material and Methods**

### 71 *2.1 Nucleotide alignment, and variant calling*

72 All SARS-CoV-2 genome sequences (n=305) that had been isolated from Indian nationals and  
73 submitted from India were downloaded on the 18<sup>th</sup> of May 2020 from the GISAID database. Out  
74 of a total of 305 sequences, 26 were found without state information and 7 had been grown in  
75 Vero cells. The rest of the isolates were collected from 20 different states which included Andhra  
76 Pradesh (n=2), Assam (n=2), Bihar (n=6), Delhi (n=39), Gujarat (n=103), Haryana (n=1), Jammu  
77 (n=1), Kashmir (n=1), Karnataka (n=17), Kerala (n=2), Ladakh (n=6), Madhya Pradesh (n=10),  
78 Maharashtra (n=7), Odisha (n=1), Punjab (n=1), Rajasthan (n=1), Tamil Nadu (n=19), Telangana  
79 (n=35), Uttar Pradesh (n=5) and West Bengal (n=13) (Supplementary table S1). Given the initial  
80 emergence of the SARS-CoV-2 virus from Wuhan, China, alignment was carried out using the  
81 genome sequence submitted by Wu *et. al.* (NC\_045512.2) in January 2020[3]. Additionally, the  
82 bat and pangolin SARS-related coronaviruses [RaTG13 (MN996532), MN789 (MT121216)] that  
83 have been reported to be the closest to the SARS-CoV-2 virus [10] were aligned to identify  
84 conserved amino acids across ORFs. Multiple sequence alignment was executed using  
85 MUSCLE [11] with three iterations for both. Since different sequencing platforms had been used  
86 to generate SARS-CoV-2 sequence data with different error rates and filtering cut-offs hence, the

87 variant calling was stringently carried out with a minimum coverage of 150 genomes.  
88 Ambiguous bases found in genome sequences were considered to be unresolved for the purpose  
89 of analyses. The SIFT database was used to identify amino acid changes that could protein  
90 function ([http://blocks.fhcrc.org/sift/SIFT\\_seq\\_submit2.html](http://blocks.fhcrc.org/sift/SIFT_seq_submit2.html)) [12].

## 91 *2.2 Measurements of diversity and deviation from neutrality*

92 Watterson's estimator ( $\theta_w$ ), nucleotide diversity ( $\pi$ ) and Tajima's D [13] for each open reading  
93 frame (ORF) was calculated using MEGA X [14].

## 94 *2.3 Phylogeny construction*

95 Phylogenetic analysis was carried out following the median-joining approach using Network  
96 10.1.0.0 software [15]. For phylogenetic construction a variant frequency cutoff of  $\geq 0.01$  was  
97 used and a 97% cutoff for the number of sequences with resolved bases for each position to  
98 avoid spurious clustering. One genome sequence (EPI\_ISL\_414515) had to be removed from  
99 analyses for the absence of complete sequence information.

## 100 **3. Results**

### 101 *3.1 Description of the variants found within the Indian SARS-CoV-2 genomes*

102 Multiple sequence alignment with 305 Indian viral sequences and ancestral Wuhan-Hu-1 isolate  
103 sequence (NC\_045512.2) revealed the presence of 572 single nucleotide variants along with 61  
104 di-nucleotide, tri-nucleotide substitutions, insertions and deletions out of which 388 were non-  
105 synonymous changes resulting in amino acid substitution. The allele frequencies of all the 633  
106 variants varied from 0.3-53.4% and greater than 90% of these were low frequency variants  
107 ranging from 0.3-1% (Figure 1A, supplementary table S2). Among the single nucleotide variants

108 C-T transition per cytosine residue in the genome was highest at 3.04%, followed by G-T  
109 transversion (1.74%) (Figure 1B, supplementary table 2). The NSP3 and S ORFs had the highest  
110 number of non-synonymous changes each (n=75, 19.33%) (Figure 1C).

### 111 *3.2 Deviation from neutral viral evolution*

112 Given the number of variants identified, the diversities across all the ORFs were calculated.  
113 ORF7a was found to have the lowest nucleotide diversity while the S ORF had the highest.  
114 Overall, the nucleotide diversity ( $\pi$ ) values were low across ORFs in comparison to the  $\theta$   
115 (Watterson's estimator) values (Figure 1D) which was indicative of the presence of higher  
116 proportion of low frequency variants as has been described in Figure 1A. The next objective was  
117 to determine if the patterns of diversity could be attributed to genetic drift or neutrality. Tajima's  
118 test for neutrality was applied and all the ORFs were found to have negative Tajima's D values  
119 (Figure 1D) indicative of non-neutral evolution.

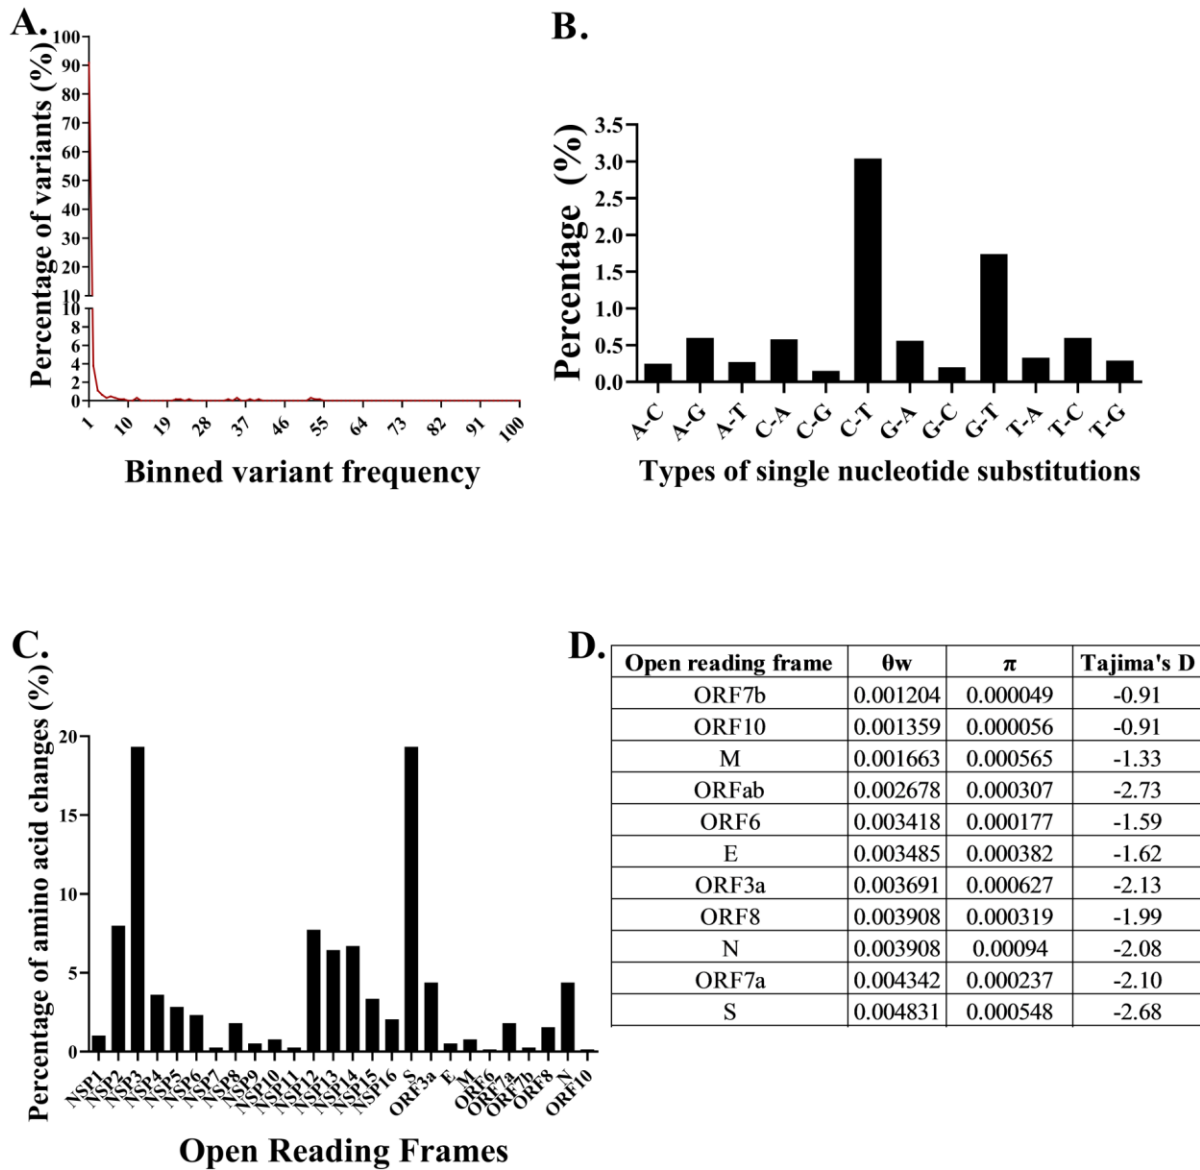

**Figure 1: Description of SARS-CoV-2 variants, the gene diversities and the results of the test for neutrality.** A. The frequencies of variants binned on the basis of frequency. B. The types of single nucleotide changes incurred by the viral genomes C. The percentage of amino acid changes per open reading frame out of a total of 388 non-synonymous changes that were observed. D. The diversity and Tajima's D values across open reading frames.

120

121

122

123 *3.4 Presence of two major clades of Indian SARS-CoV-2 haplotypes with emergence of multiple*  
124 *subclusters*

125 To trace the ancestries of the Indian viral isolates, network analysis was carried out using the  
126 Hamming distances of variants present at  $\geq 1\%$  frequency among the genomes (Supplementary  
127 table S3). The haplotypes were generated stringently using a total of 53 single nucleotide  
128 variants, a di-nucleotide variant AA-CU at positions 10,478-10,479, a tri-nucleotide substitution  
129 at positions 28,881-28,883GGG-AAC together resulting in 38 amino acid changes and 304  
130 Indian SARS-CoV-2 genome sequences (Figure 2, Supplementary table S4). A total of 54 nodes  
131 with 54 distinct haplotypes were discovered using 304 genome sequences. The network  
132 appearance was as expected from an ongoing pandemic with the presence of ancestral viral  
133 haplotypes existing along with newly mutated genomes. There were two major clusters of  
134 haplotypes that were found to have emerged from the ancestral Wuhan-Hu-1 virus (clade L)  
135 identified to be belonging to clade G and a variant of the clade L which has been annotated here  
136 as  $L_v$  (Figure 3). Seventy-nine viral isolates were found to be belonging to clade  $L_v$  and there  
137 were 36 clade G viruses. The clade  $L_v$  genomes differed from the ancestral Wuhan-Hu-1  
138 sequence at one locus resulting in a change in the RNA dependent RNA polymerase (RdRp)  
139 protein [C13,730U,(A97V)] while the G haplotype viruses differed at three loci resulting in one  
140 amino acid change each in the RdRp, S protein [C3037U, C14,408U (RdRp: P323L), A23,403G  
141 (S:D614G)]. Two sub-clusters were observed evolving from clade G; GH variant mentioned  
142 here as  $GH_v$  with the variants C18877U, G25563U (ORF3a:Q57H), C26735U having multiple  
143 evolving branches and GR with the tri-nucleotide GGG-AAC substitution at positions 28,881-  
144 28,883 resulting in two amino acid changes R203K, G204R in the N protein (Figure 3).





148

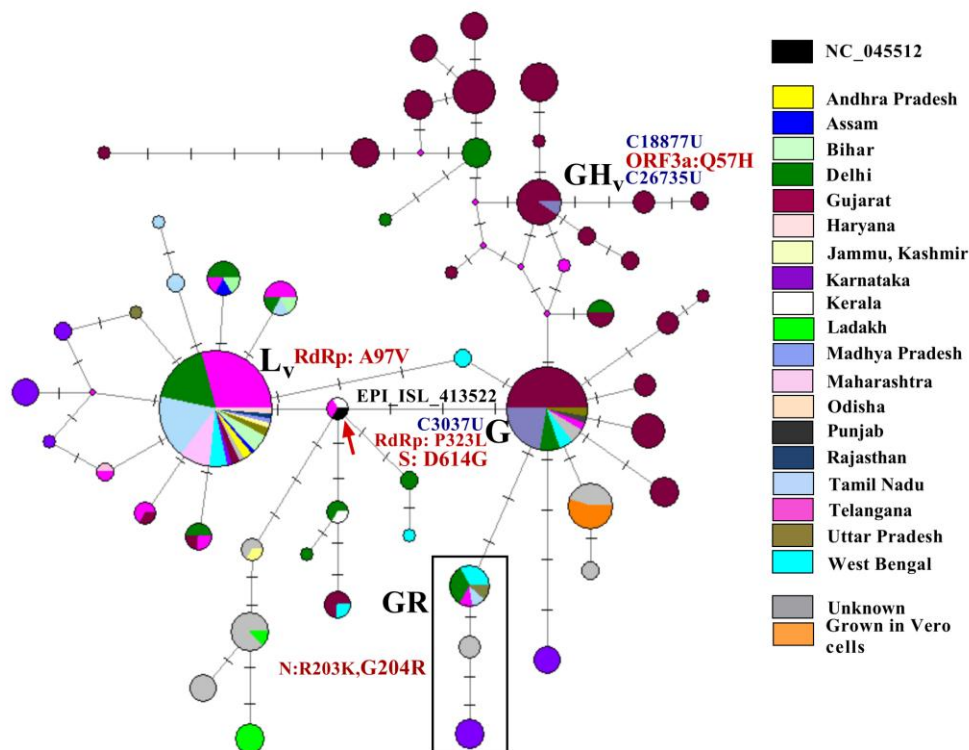

**Figure 3: Phylogenetic network of 304 Indian SARS-CoV-2 viral genomes.** Each circle represents a haplotype and the diameter is proportional to the number of genomes belonging to each haplotype. Each notch on a horizontal line represent a differentiating variant and the length of the connecting lines are proportional to the number of variants. The colors indicate the different states from which specimens were collected. The arrow indicates the node containing the ancestral NC\_045512 viral haplotype and the sequence ID indicate the first sequenced viral genome from a symptomatic individual with travel history to Wuhan, China. A total of 55 variants were used to construct the haplotypes and the nucleotide and amino acid differences in comparison with NC\_045512 among the major clades L<sub>v</sub>(RdRp:A97V), G, GH<sub>v</sub> [C18887U, C26735U] and GR with the 48881-48883(GGG-AAC, N:R203K, G204R) variants are mentioned.

149

150 There were 14 variants [C241U, C1707U, G2632U, C6310A, C6312A, U8022G,  
 151 G11083U, A15435G, U19299G, A19422G, C19524U, C23929U, G27613U, C28311U] that  
 152 could not be included in the network analysis because of the presence of unresolved bases at  
 153 multiple viral genome sequences. These variants were subsequently evaluated in the subset of  
 154 sequences that had information among the major haplotypes belonging to clade L<sub>v</sub> (n=28) and G  
 155 (n=20). The variants G11083U (NSP6:L37F), C23929U, C28311U (N:P13L) were found to  
 156 cluster in high proportion of clade L<sub>v</sub> viruses (71.5%) and as expected the 5' UTR variant C241T  
 157 was found to cluster among the clade G viral isolates and its evolving sub-clusters.

158 All the amino acid changes that were present at  $\geq 1\%$  frequency were also evaluated on  
159 the basis of conservation (Table 1). NSP3 amino acid changes were found to be at the most non-  
160 conserved sites; however, the changes were predicted to be affecting protein function. Further,  
161 there were three loci where the variants resulted in amino acid changes that were fixed in either  
162 the RaTG13 or the MN789 genome (NSP2: V198I, NSP3: D1121G, T1198K). Most of the  
163 variants across clades L<sub>v</sub>, G, GH<sub>v</sub> and GR were found to occur in conserved codons across  
164 species except for the NSP6: L37F variant where the leucine codon had been replaced by a  
165 valine in the MN789 genome and the S:D614G variant where the pangolin coronavirus isolate  
166 MN789 S-ORF had a threonine codon.

| Nucleotide position | Coding region   | Change  | Amino Acid change | RaTG13 | MN789 | SIFT prediction            | Variant Frequency |
|---------------------|-----------------|---------|-------------------|--------|-------|----------------------------|-------------------|
| 28881-28883         | N               | GGG-AAC | R203K, G204R      | R      | R     | * Affects protein function | 5.30%             |
| 28878               |                 | G-A     | S202N             | S      | S     |                            | 1.30%             |
| 28854               |                 | C-U     | S194L             | S      | S     |                            | 11.40%            |
| 28311               |                 | C-U     | P13L              | P      | P     |                            | 33.00%            |
| 28144               | ORF8            | U-C     | L84S              | S      | I     |                            | 2.30%             |
| 27613               | ORF7a           | G-U     | V74F              | V      | I     |                            | 1.80%             |
| 26467               | E               | G-U     | V75F              | V      | V     |                            | 3.40%             |
| 26144               | ORF3a           | G-U     | G251V             | G      | G     |                            | 1.00%             |
| 25613               |                 | C-U     | S74F              | S      | S     |                            | 1.00%             |
| 25563               |                 | G-U     | O57H              | Q      | Q     |                            | 23.10%            |
| 23403               |                 | A-G     | D614G             | D      | T     |                            | 52.00%            |
| 23311               | S               | G-U     | E583D             | E      | I     |                            | 2.00%             |
| 23277               |                 | C-U     | T572I             | T      | V     |                            | 1.30%             |
| 22093               |                 | G-U     | M177I             | M      | D     |                            | 1.00%             |
| 21795               |                 | G-U     | R78M              | R      | R     |                            | 3.00%             |
| 21792               |                 | A-U     | K77M              | K      | K     |                            | 2.00%             |
| 21724               |                 | G-U     | L54F              | L      | G     |                            | 1.30%             |
| 20063               | NSP15           | U-C     | V148A             | V      | V     | Affects protein function   | 1.30%             |
| 16993               | Helicase(NSP13) | U-C     | Y253H             | Y      | Y     |                            | 1.70%             |
| 16945               |                 | G-A     | A237T             | V      | A     |                            | 1.40%             |
| 16078               |                 | G-A     | V880I             | V      | V     |                            | 3.60%             |
| 14425               |                 | C-A     | L329I             | L      | V     |                            | 1.60%             |
| 14408               | RDRP(NSP12)     | C-U     | P323L             | P      | P     |                            | 51.80%            |
| 13730               |                 | C-U     | A97V              | A      | A     | Affects protein function   | 37.90%            |
| 12685               |                 | G-U     | Q198H             | Q      | Q     | Affects protein function   | 2.00%             |
| 11083               |                 | G-U     | L37F              | V      | V     | Affects protein function   | 39.40%            |
| 10478-10479         | NSP6            | AA-CU   | N142L             | N      | N     |                            | 1.70%             |
| 9438                | NSP5            | C-U     | T295I             | T      | N     | Affects protein function   | 1.00%             |
| 8653                | NSP4            | G-U     | M33I              | M      | M     | Affects protein function   | 5.60%             |
| 8022                |                 | U-G     | V1768G            | I      | A     | Affects protein function   | 3.90%             |
| 7392                |                 | C-U     | P1558L            | K      | M     | Affects protein function   | 3.00%             |
| 6312                |                 | C-A     | T1198K            | T      | N     | Affects protein function   | 34.20%            |
| 6310                | NSP3            | C-A     | S1197R            | S      | S     | Affects protein function   | 6.30%             |
| 6081                |                 | A-G     | D1121G            | D      | G     | Affects protein function   | 1.30%             |
| 4866                |                 | G-U     | S716I             | Y      | Q     |                            | 1.60%             |
| 4809                |                 | C-U     | S697F             | Y      | P     |                            | 4.30%             |
| 3742                |                 | A-G     | I341M             | H      | D     |                            | 1.30%             |
| 3176                |                 | C-U     | P153S             | P      | I     |                            | 1.00%             |
| 2632                | NSP2            | G-U     | M609I             | M      | M     |                            | 1.00%             |
| 1820                |                 | G-A     | G339S             | G      | G     | Affects protein function   | 1.30%             |
| 1707                |                 | C-U     | S301F             | S      | S     | Affects protein function   | 2.10%             |
| 1397                |                 | G-A     | V198I             | V      | I     | Affects protein function   | 6.60%             |
| 1281                |                 | C-U     | A159V             | A      | A     | Affects protein function   | 1.00%             |
| 1059                |                 | C-U     | T85I              | T      | T     | Affects protein function   | 1.30%             |
| 884                 | NSP1            | C-U     | R27C              | R      | R     | Affects protein function   | 5.60%             |

167

168 Table 1: The amino acid changes present at  $\geq 1\%$  frequency in each ORF across conserved and  
 169 non-conserved positions in different ORFs. The protein function affecting changes are marked  
 170 according to SIFT scores. The grey cells indicate non-conserved positions and the yellow cells  
 171 indicate variants that code for the same amino acids as fixed either in bat coronavirus RaTG13 or  
 172 pangolin coronavirus MN789 genomes.

173

174

175

### 176 3.4 Statewise distribution of viral haplotypes

177 There were two individuals with whole genome sequence data (sequence IDs EPI\_ISL\_413522,  
178 EPI\_ISL\_413523) from Kerala who were the first to be identified with COVID-19 symptoms  
179 and specimens were collected from India on 27<sup>th</sup> January and 31<sup>st</sup> January 2020 respectively [9].  
180 It was found that the EPI\_ISL\_413522 haplotype clustered with the Wuhan-Hu-1 haplotype and  
181 the second isolate had two nucleotide changes resulting in an amino acid change in the ORF8  
182 protein [C8782U, U28,144C (ORF8: L84S)] (Figure 3). Additionally, a viral isolate collected on  
183 1<sup>st</sup> March 2020 from Telangana was also found to cluster with the ancestral isolate.

184 So far the highest number of deaths per number of confirmed cases has been recorded in  
185 the states of Gujarat (6.2%), Madhya Pradesh (4.3) and West Bengal (6.9%) (Supplementary  
186 table S5). Out of these three states the maximum numbers of isolates have been sequenced from  
187 Gujarat (n=103). Among the total of 103 of these viral isolates, 18 (17.5%) were found to belong  
188 to clade G, while the rest with the exception of 7 L<sub>v</sub> clade isolates (6.8%) were distributed among  
189 sub-clusters arising from clade G (n=77; 74.8%) with additional number of variants. Among the  
190 7 clade L<sub>v</sub> viral isolates, 6 were observed to have been isolated from individuals of the same city,  
191 Surat. The isolates from Madhya Pradesh (n=10) were also distributed between clade G and its  
192 sub-cluster, clade GH<sub>v</sub> while >50% (7 out of 13) the West Bengal isolates belonged to clade G,  
193 GR or another sub-cluster of clade G with the S:D614G variant. The viral isolates(n=6) from  
194 Bihar which has much lower mortality rates (0.5%) were found to be distributed among the clade  
195 L<sub>v</sub> and its branches and the isolates from Ladakh (n=6) which has not had any COVID-19 deaths  
196 were found to differ from the ancestral isolate with three non-synonymous changes [C884U  
197 (nsp2: R27C), G1397A (NSP2: V198I), G8653U (NSP4: M33I)] , a synonymous change  
198 (U28688C), a change in the 3'UTR region [G29742U] and one non-synonymous and another

199 synonymous change in 5 of the 6 isolates [U16993C (nsp13: Y253H), U25461C]. The isolate  
200 sequences from Delhi which has 2% mortality were found to be distributed across the both the  
201 major clusters and sub-clusters.

202

#### 203 **4. Discussion**

204 A number of studies from India have described the presence of various mutations across the  
205 SAR-CoV-2 genome with hints of selection and *in silico* predictions of alterations in protein  
206 functions [16-18] so far. In this study an attempt has been made to understand the pattern of  
207 evolution within human hosts, to infer the ancestries of the viral isolates using the phylogenetic  
208 network approach which had been used earlier to build SARS-CoV-2 infection paths [19] and  
209 make an effort at correlating it with morbidity.

210 While comparing the 305 Indian SARS-CoV-2 genomes a number of nucleotide variants  
211 or segregating sites were identified, however, the nucleotide diversity values ( $\pi$ ) were indicative  
212 of an excess of low frequency variants. This could be because of recent population expansions as  
213 has been observed in H1N1 populations involved in outbreaks and epidemics [20] and the  
214 uniform negative Tajima's D values across all the SARS-CoV-2 ORFs could also be attributed to  
215 it.

216 The clade G (S:D614G) viruses with the C14,408U (RdRp: P323L) variant were found to  
217 incur more number of mutations leading to the emergence of a number of sub-clusters of viruses  
218 with increased branch lengths in comparison to the clade L<sub>v</sub> viruses including clade GH and GR.  
219 These clade G viruses were also found in more numbers in states where higher mortality rates  
220 were recorded. Occurrence of higher numbers of mutations might be attributed to altered

221 secondary structure and impaired RdRp proofreading due to the C14,408U (RdRp: P323L)  
222 variant as has been speculated in earlier reports [21, 22]. Additionally, there has been a report on  
223 clinical outcome from Sheffield, England where the G614 mutation was associated with higher  
224 viral loads [23] which might be contributing to the higher mortality rates. However, these  
225 implications will have to be tested further with direct correlations using comprehensive clinical  
226 data and genomic data from all the states.

### 227 **Supplementary materials**

228 S1 table: Details of all the sequences included in the study.

229 S2 table: Description all the variants identified in this study.

230 S3 table: Features of the variants included in the construction of viral haplotypes.

231 S4 table: Haplotype information.

232 S5 table: Official state-wise numbers of confirmed COVID-19 cases and deaths from 19 Indian  
233 states as updated on 28<sup>th</sup> May 2020.

234

### 235 **Acknowledgments**

236 The authors acknowledge the submitters of coronavirus sequence data to the GISAID database,  
237 the database managers, developers and scientists associated with GISAID and Prof. Saumitra  
238 Das for encouragement.

239

### 240 **Author Contributions**

241 Conceptualization, B.B.; data curation, B.B.; data analysis, writing-original draft, B.B. & B.P.;;  
242 writing- review and editing, B.B. & B.P. Both authors approved the manuscript.

243 **Competing interests**

244 None declared.

245

246 **Funding**

247 B.B was supported by the Ramanujan fellowship funded by the Department of Science and

248 Technology, Government of India.

249

250

251

252

253

254

255

256

257

258

259

260

261



## 262 References

- 263 1. Lu, R.; Zhao, X.; Li, J.; Niu, P.; Yang, B.; Wu, H.; Wang, W.; Song, H.; Huang, B.; Zhu,  
264 N.; Bi, Y.; Ma, X.; Zhan, F.; Wang, L.; Hu, T.; Zhou, H.; Hu, Z.; Zhou, W.; Zhao, L.; Chen, J.;  
265 Meng, Y.; Wang, J.; Lin, Y.; Yuan, J.; Xie, Z.; Ma, J.; Liu, W. J.; Wang, D.; Xu, W.; Holmes, E.  
266 C.; Gao, G. F.; Wu, G.; Chen, W.; Shi, W.; Tan, W., Genomic characterisation and epidemiology  
267 of 2019 novel coronavirus: implications for virus origins and receptor binding. *Lancet* **2020**, *395*,  
268 (10224), 565-574.
- 269 2. (<https://covid19.who.int/>). WHO **2020**.
- 270 3. Wu, F., Zhao, S., Yu, B. et al. , A new coronavirus associated with human respiratory  
271 disease in China. *Nature* **2020**, *579*, 265-269
- 272 4. <https://www.gisaid.org/>. **2020**.
- 273 5. Zhou, H.; Chen, X.; Hu, T.; Li, J.; Song, H.; Liu, Y.; Wang, P.; Liu, D.; Yang, J.;  
274 Holmes, E. C.; Hughes, A. C.; Bi, Y.; Shi, W., A Novel Bat Coronavirus Closely Related to  
275 SARS-CoV-2 Contains Natural Insertions at the S1/S2 Cleavage Site of the Spike Protein.  
276 *Current biology* : **2020**.
- 277 6. Liu, P.; Chen, W.; Chen,P.; Viral Metagenomics Revealed Sendai Virus and Coronavirus  
278 Infection of Malayan Pangolins (*Manis javanica*). *Viruses* **2019**, *11*, (11), 979.
- 279 7. <https://www.mygov.in/corona-data/covid19-statewise-status/>. **2020**.
- 280 8. Maitra, A.; Chawla Sarkar., M.; Rajaja, H.; Biswas N.K.; Chakraborti, S.; Singh,A.K.;  
281 Ghosh, S.; Sarkar, S.; Patra, S.; Mandal, R.K.; Ghosh,T. et.al., Mutations in SARS Cov2 viral  
282 RNA identified in Eastern India: Possible implication for the ongoing outbreak in India and  
283 impact on viral structure and host susceptibility. *J Biosciences* **2020**, *45*.
- 284 9. Yadav, P. D.; Potdar, V. A.; Choudhary, M. L.; Nyayanit, D. A.; Agrawal, M.; Jadhav, S.  
285 M.; Majumdar, T. D.; Shete-Aich, A.; Basu, A.; Abraham, P.; Cherian, S. S., Full-genome  
286 sequences of the first two SARS-CoV-2 viruses from India. *The Indian journal of medical*  
287 *research* **2020**, *151*, (2 & 3), 200-209.
- 288 10. Tang, X. Wu., C.; Li, X.;Song, Y.; Yao,X.; Wu, X.; Duan, Y.; Zhang, H.; Wang, Y.;  
289 Qian,Z, On the origin and continuing evolution of SARS-CoV-2 *National Science Review* **2020**.
- 290 11. Edger, R. C., MUSCLE: multiple sequence alignment with high accuracy and  
291 highthroughput *Nucleic Acids Research* **2004**, *32*, (5), 1792-1797.
- 292 12. Ng, P. C.; Henikoff., S, Predicting Deleterious Amino Acid Substitutions. *Genome*  
293 *Research* **2001**, *11*(5):863-74.
- 294 13. Tajima, F., Statistical methods to test for nucleotide mutation hypothesis by DNA  
295 polymorphism. *Genetics* **1989**, *123*, 585-595.
- 296 14. Kumar, S.; Stecher G.; Li M.; Knyaz C.; Tamura, K. MEGA X: Molecular Evolutionary  
297 Genetics Analysis across computing platforms. *Molecular biology and evolution* **2018**, *35*, 1547-  
298 1549.
- 299 15. Bandelt H-J, Forster, P., Röhl A. Median-joining networks for inferring intraspecific  
300 phylogenies. *Mol. Biol. Evol.* **1999**, *16*, 37- 48.
- 301 16. Banerjee, A.; Sarkar, R.; Mitra,S.; Mahadeb Lo, M.; Dutta, S.; Chawla-Sarkar,M., The  
302 novel Coronavirus enigma: Phylogeny and mutation analyses of SARS-CoV-2 viruses  
303 circulating in India during early 2020. *bioRxiv* **2020**, *2020.05.25 114199*.
- 304 17. Begum, F.; Mukherjee, D.; Thagriki, D.; Das, S.; Tripathi,P.P.; Banerjee,A.K.; Ray, U.,  
305 Analyses of spike protein from first deposited sequences of SARS-CoV2 from West Bengal,  
306 India. *bioRxiv* **2020**, *2020.04.28.066985*.

- 307 18. Bhowmik, D.; Pal, S.; Lahiri, A.; Talukdar, A.; Paul, S., Emergence of multiple  
308 variants of SARS-CoV-2 with signature structural changes. *bioRxiv* **2020**, *2020.04.26.062471*.
- 309 19. Forster, P.; Forster, L.; Renfrew, C.; Forster, M. Phylogenetic network analysis of SARS-  
310 CoV-2 genomes. *PNAS* **2020**, *117*, (17), 9241-9243.
- 311 20. Martinez-Hernandez, F.; Jimenez-Gonzalez, D. E.; Martinez-Flores, A.; Villalobos-  
312 Castillejos, G.; Vaughan, G.; Kawa-Karasik, S.; Flisser, A.; Maravilla, P.; Romero-Valdovinos, M.,  
313 What happened after the initial global spread of pandemic human influenza virus A (H1N1)? A  
314 population genetics approach. *Virology journal* **2010**, *7*, 196.
- 315 21. Pachetti, M.; Marini, B.; Benedetti, F.; Giudici, F.; Mauro, E.; Storici, P.; Masciovecchio,  
316 C.; Angeletti, S.; Ciccozzi, M.; Gallo, R. C.; Zella, D.; Ippodrino, R., Emerging SARS-CoV-2  
317 mutation hot spots include a novel RNA-dependent-RNA polymerase variant. *Journal of*  
318 *translational medicine* **2020**, *18*, (1), 179.
- 319 22. Chand, G. B.; Banerjee, A.; Azad G.K. Identification of novel mutations in RNA-  
320 dependent RNA polymerases of SARS-CoV-2 and their implications on its protein structure.  
321 *bioRxiv* **2020**, *2020.05.05.079939*.
- 322 23. Korber, B.; Fischer, W., Gnanakaran S, Yoon H, Theiler J, Abfalterer W, Foley B, Giorgi  
323 EE, Bhattacharya T, Parker MD, Partridge DG, Evans CM, de Silva T, on behalf of the Sheffield  
324 COVID-19 Genomics Group, LaBranche CC,; DC, M., Spike mutation pipeline reveals the  
325 emergence of a more transmissible form of SARS-CoV-2. *bioRxiv* **2020**, *2020.04.29.069054*.
- 326
- 327
- 328
